# Supplementary material for: Dietary Effects on Monocyte Phenotypes in Subjects With Hypertriglyceridemia and Metabolic Syndrome
Source: PubMed Central journal article supplement (PMC10264566; doi:10.1016/j.jacbts.2023.02.011), 2023-04-26
Supplement: mmc1.pdf [file mmc1.pdf]

**Supplemental Table 1. Antibodies used in the flow cytometry experiments.**

| <b>Marker</b> | <b>Clone</b>     | <b>Company</b>  |
|---------------|------------------|-----------------|
| CCR2          | K036C2           | BioLegend       |
| CCR5          | J418F1           | BioLegend       |
| CD11a         | m24              | BioLegend       |
| CD11c         | 3.9              | BioLegend       |
| CD14          | RMO52            | Beckman Coulter |
| CD16          | 3G8              | Beckman Coulter |
| CD36          | FA6.152          | Beckman Coulter |
| CD62L         | DREG56           | Beckman Coulter |
| CD81          | 1D6-CD81         | eBioscience     |
| CX3CR1        | 2A9-1            | BioLegend       |
| HLA-DR        | Immu-357         | Beckman Coulter |
| LRP1 (CD91)   | A2MR- $\alpha$ 2 | BD Biosciences  |
| SRA           | 351615           | R&D Systems     |
| VLA4          | 9F10             | BioLegend       |

**Supplemental Table 2. Flow cytometric analysis protocols**

| <b>Protocol</b> | <b>PE</b> | <b>KO</b> | <b>PECy7</b> | <b>V450</b> | <b>PerCPcy5.5</b> | <b>APC</b> | <b>FITC</b> | <b>APC-AF750</b> | <b>APC-Cy7</b> |
|-----------------|-----------|-----------|--------------|-------------|-------------------|------------|-------------|------------------|----------------|
| 1               | SRA       | CD14      | CD16         |             | CCR2              | CX3CR1     | CD36        | CD62L            |                |
| 2               | VLA4      | CD14      | CD16         | CD11c       |                   | CD81       | CD11a       | HLA-DR           |                |
| 3               | CD91      | CD14      | CD16         |             |                   |            | Nile red    |                  | CCR5           |
| 4               | DiI-oxLDL | CD14      | CD16         |             |                   |            |             |                  | Viability dye  |

**Supplemental Table 3. Plasma levels of fatty acids and GlycA examined by nuclear magnetic resonance**

| Fatty acids and GlycA | HSFD      |           |           |           | LSFD      |           |           |           | P value in 4-day diet phase                     | P value in postprandial phase                   |
|-----------------------|-----------|-----------|-----------|-----------|-----------|-----------|-----------|-----------|-------------------------------------------------|-------------------------------------------------|
|                       | D1        | T0        | T4        | T6        | D1        | T0        | T4        | T6        |                                                 |                                                 |
| Total-FA, mmol/L      | 13.6±0.67 | 13.7±0.72 | 16.3±0.73 | 15.4±0.65 | 13.8±0.93 | 13.5±0.63 | 16.2±1.02 | 14.8±0.76 | Diet = 0.86<br>Time = 0.77<br>Diet:Time = 0.46  | Diet = 0.65<br>Time <0.001<br>Diet:Time = 0.71  |
| Unsaturation, degree  | 1.34±0.02 | 1.33±0.02 | 1.28±0.02 | 1.3±0.02  | 1.36±0.02 | 1.36±0.02 | 1.33±0.02 | 1.36±0.02 | Diet = 0.019<br>Time = 0.62<br>Diet:Time = 0.81 | Diet = 0.008<br>Time <0.001<br>Diet:Time <0.001 |
| Omega-3, mmol/L       | 0.50±0.04 | 0.48±0.04 | 0.57±0.06 | 0.52±0.05 | 0.51±0.05 | 0.53±0.04 | 0.63±0.05 | 0.59±0.04 | Diet = 0.80<br>Time = 0.37<br>Diet:Time = 0.20  | Diet = 0.14<br>Time <0.001<br>Diet:Time = 0.77  |
| Omega-6, mmol/L       | 4.96±0.13 | 4.98±0.16 | 5.44±0.18 | 5.27±0.18 | 5.19±0.19 | 5.04±0.13 | 5.66±0.24 | 5.38±0.18 | Diet = 0.22<br>Time = 0.88<br>Diet:Time = 0.34  | Diet = 0.92<br>Time = 0.001<br>Diet:Time = 0.63 |
| PUFA, mmol/L          | 5.46±0.15 | 5.46±0.18 | 6.01±0.20 | 5.78±0.20 | 5.7±0.22  | 5.57±0.15 | 6.3±0.27  | 5.97±0.2  | Diet = 0.26<br>Time = 1.00<br>Diet:Time = 0.53  | Diet = 0.74<br>Time <0.001<br>Diet:Time = 0.68  |
| MUFA, mmol/L          | 3.59±0.27 | 3.58±0.29 | 4.57±0.25 | 4.24±0.23 | 3.58±0.36 | 3.59±0.25 | 4.62±0.37 | 4.06±0.28 | Diet = 0.73<br>Time = 0.91<br>Diet:Time = 0.87  | Diet = 0.87<br>Time <0.001<br>Diet:Time = 0.50  |
| SFA, mmol/L           | 4.5±0.29  | 4.63±0.29 | 5.75±0.32 | 5.34±0.27 | 4.53±0.38 | 4.34±0.27 | 5.31±0.42 | 4.76±0.32 | Diet = 0.93<br>Time = 0.39<br>Diet:Time = 0.12  | Diet = 0.22<br>Time <0.001<br>Diet:Time = 0.39  |
| LA, mmol/L            | 3.91±0.12 | 3.89±0.17 | 4.33±0.20 | 4.07±0.19 | 4.14±0.18 | 3.95±0.13 | 4.55±0.25 | 4.25±0.19 | Diet = 0.19<br>Time = 0.89<br>Diet:Time = 0.31  | Diet = 0.92<br>Time = 0.002<br>Diet:Time = 0.68 |
| DHA, mmol/L           | 0.18±0.01 | 0.18±0.01 | 0.18±0.02 | 0.17±0.02 | 0.19±0.01 | 0.20±0.01 | 0.22±0.02 | 0.20±0.01 | Diet = 0.66<br>Time = 0.79                      | Diet = 0.15<br>Time = 0.14                      |

|            |           |           |           |           |           |           |           |           |                                                  |                                                  |
|------------|-----------|-----------|-----------|-----------|-----------|-----------|-----------|-----------|--------------------------------------------------|--------------------------------------------------|
|            |           |           |           |           |           |           |           |           | Diet:Time = 0.28                                 | Diet:Time = 0.11                                 |
| Omega-3, % | 3.69±0.25 | 3.54±0.28 | 3.45±0.28 | 3.32±0.29 | 3.69±0.25 | 3.93±0.21 | 3.89±0.20 | 4.0±0.21  | Diet = 0.98<br>Time = 0.14<br>Diet:Time = 0.008  | Diet = 0.022<br>Time = 0.003<br>Diet:Time <0.001 |
| Omega-6, % | 37.5±1.11 | 37.2±0.96 | 33.8±0.81 | 34.6±0.76 | 38.7±1.15 | 37.9±0.93 | 35.6±0.93 | 36.9±0.85 | Diet = 0.041<br>Time = 0.5<br>Diet:Time = 0.46   | Diet = 0.14<br>Time <0.001<br>Diet:Time = 0.003  |
| PUFA, %    | 41.1±1.16 | 40.7±1.03 | 37.3±0.81 | 38±0.77   | 42.4±1.18 | 41.9±0.95 | 39.5±0.90 | 40.9±0.85 | Diet = 0.048<br>Time = 0.41<br>Diet:Time = 0.87  | Diet = 0.046<br>Time <0.001<br>Diet:Time <0.001  |
| MUFA, %    | 26±0.71   | 25.7±0.71 | 27.8±0.46 | 27.4±0.49 | 25.2±0.72 | 26.3±0.67 | 28.1±0.54 | 27.2±0.52 | Diet = 0.023<br>Time = 0.31<br>Diet:Time = 0.002 | Diet = 0.15<br>Time <0.001<br>Diet:Time = 0.008  |
| SFA, %     | 32.8±0.58 | 33.6±0.46 | 34.9±0.55 | 34.6±0.43 | 32.4±0.60 | 31.9±0.58 | 32.4±0.63 | 31.9±0.55 | Diet = 0.38<br>Time = 0.083<br>Diet:Time = 0.005 | Diet <0.001<br>Time <0.001<br>Diet:Time = 0.003  |
| LA, %      | 29.5±0.98 | 28.8±0.87 | 26.7±0.8  | 26.6±0.74 | 30.8±1.01 | 29.7±0.85 | 28.4±0.91 | 29±0.79   | Diet = 0.058<br>Time = 0.27<br>Diet:Time = 0.47  | Diet = 0.22<br>Time <0.001<br>Diet:Time = 0.011  |
| DHA, %     | 1.39±0.12 | 1.4±0.12  | 1.13±0.12 | 1.09±0.11 | 1.41±0.11 | 1.52±0.09 | 1.39±0.08 | 1.41±0.08 | Diet = 0.74<br>Time = 0.79<br>Diet:Time = 0.19   | Diet = 0.14<br>Time <0.001<br>Diet:Time <0.001   |

|                 |           |           |            |           |           |           |           |           |                                                  |                                                  |
|-----------------|-----------|-----------|------------|-----------|-----------|-----------|-----------|-----------|--------------------------------------------------|--------------------------------------------------|
| PUFA/MUFA       | 1.62±0.08 | 1.62±0.08 | 1.35±0.05  | 1.4±0.05  | 1.73±0.09 | 1.62±0.07 | 1.42±0.05 | 1.52±0.05 | Diet = 0.021<br>Time = 0.98<br>Diet:Time = 0.047 | Diet = 0.89<br>Time <0.001<br>Diet:Time <0.001   |
| Omega-6/Omega-3 | 10.8±0.73 | 11.3±0.73 | 10.7±0.71  | 11.6±0.92 | 11.3±0.84 | 10.2±0.67 | 9.69±0.75 | 9.78±0.72 | Diet = 0.23<br>Time = 0.20<br>Diet:Time = 0.005  | Diet = 0.010<br>Time <0.001<br>Diet:Time = 0.007 |
| GlycA, mmol/L   | 0.91±0.04 | 0.92±0.04 | 0.996±0.03 | 0.96±0.04 | 0.94±0.05 | 0.95±0.04 | 1.03±0.04 | 1.0±0.05  | Diet = 0.34<br>Time = 0.53<br>Diet:Time = 0.85   | Diet = 0.56<br>Time = 0.003<br>Diet:Time = 0.75  |

Data are presented as mean ± SEM. Time points: day 1 fasting (D1); day 5 fasting (T0) and 4 hours (T4) and 6 hours (T6) after test meal.

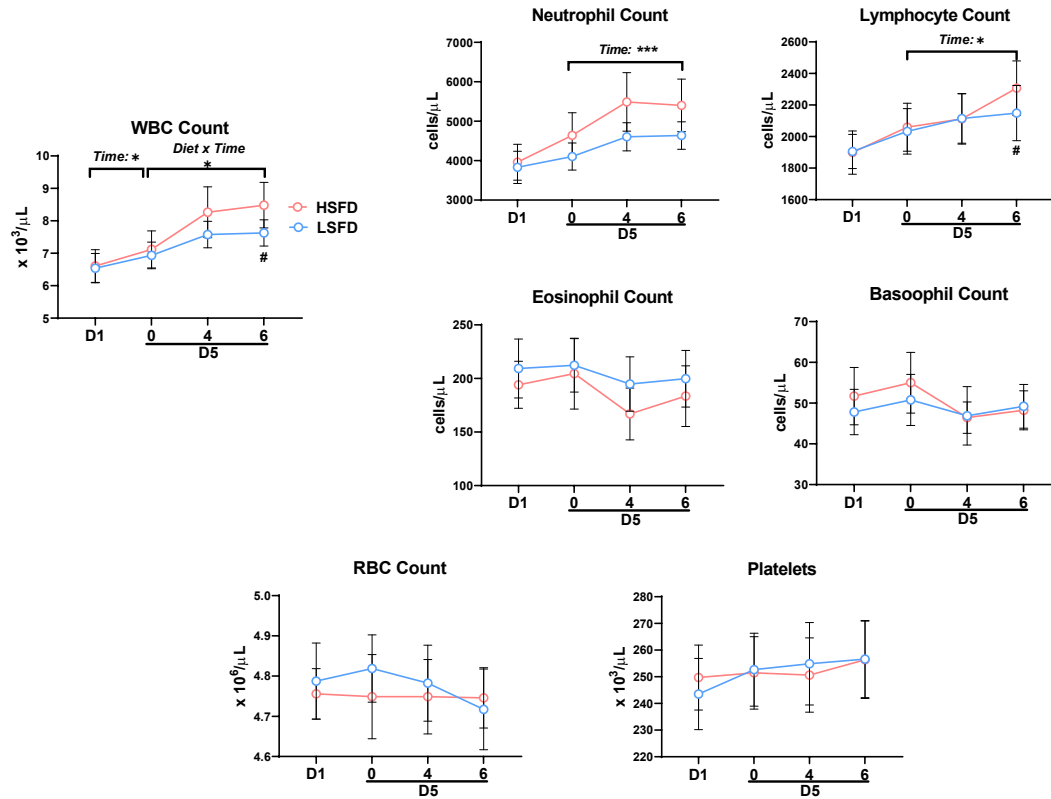

**Supplemental Figure 1. Complete blood counts.** Counts of total white blood cell (WBC), neutrophils, lymphocytes, eosinophils, basophils, red blood cells (RBC), and platelets. Data are presented as mean ± SEM. \*P<0.05, \*\*\*P<0.001 for main effects; #P<0.05 post hoc test for pairwise comparisons between diets at indicated time points (day 1 [D1] fasting; day 5 [D5] fasting [0] and 4 hours [4] and 6 hours [6] after a test meal).

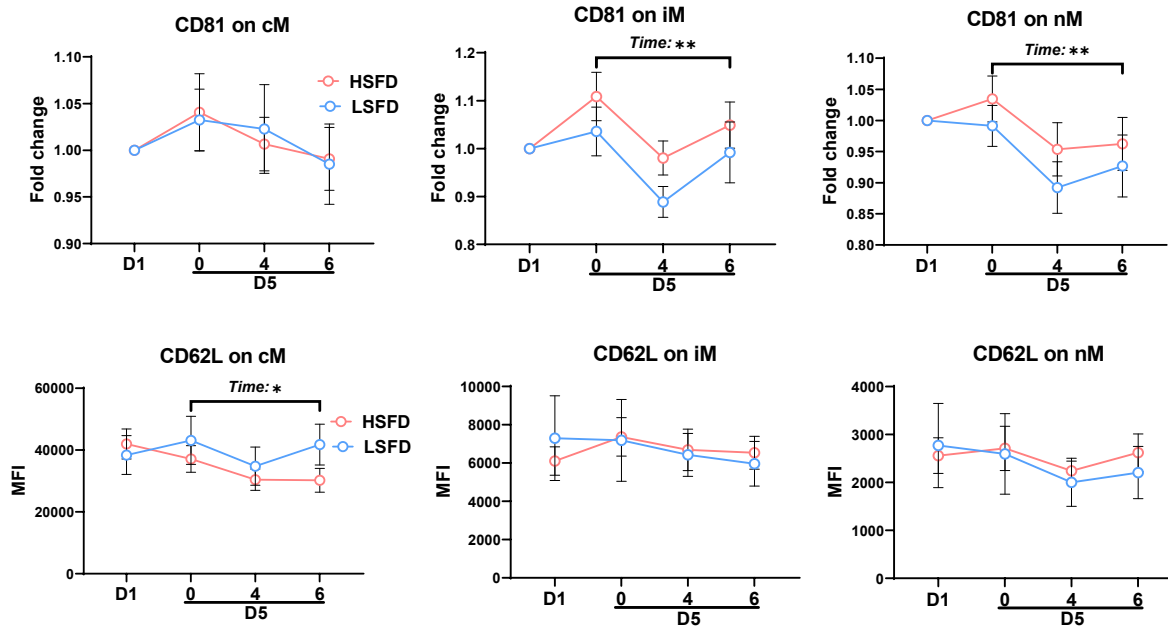

**Supplemental Figure 2. Adhesion molecules.** Expression levels of adhesion molecules including CD81 and CD62L on monocyte subsets examined by flow cytometry. MFI: mean fluorescence intensity. Data are presented as mean  $\pm$  SEM. \* $P < 0.05$ , \*\* $P < 0.01$  for main effects.

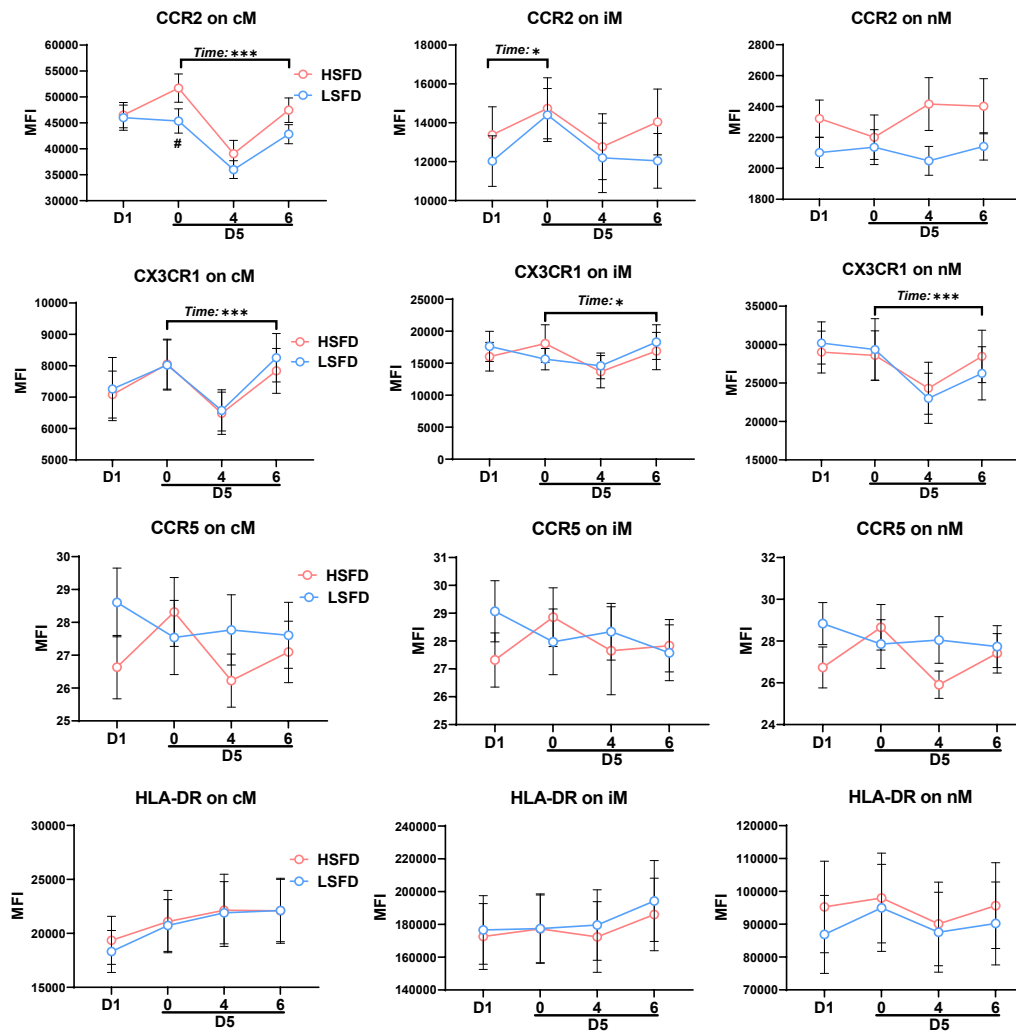

**Supplemental Figure 3. Chemokine receptors and HLA-DR.** Expression levels, indicated by MFI, of chemokine receptors and HLA-DR on monocyte subsets examined by flow cytometry. Data are presented as mean  $\pm$  SEM. \* $P < 0.05$ , \*\*\* $P < 0.001$  for main effects; # $P < 0.05$  post hoc test for pairwise comparisons between diets at indicated time points.



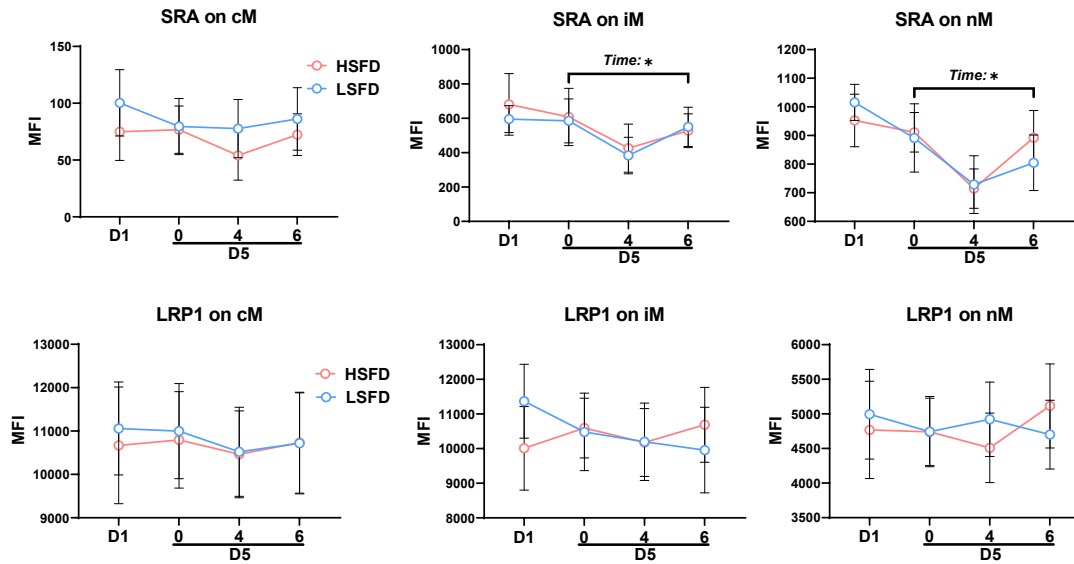

**Supplemental Figure 4. Scavenger receptor A (SRA) and LDL receptor–related protein 1 (LRP1).** Expression levels, indicated by MFI, of SRA and LRP1 on monocyte subsets examined by flow cytometry. Data are presented as mean  $\pm$  SEM. \* $P < 0.05$  for main effects.
